# Supplementary material
Source: Elsevier journal article supplement (https://www.sciencedirect.com/science/article/pii/S0121812321000992)
Supplement: mmc1 [file S0121812321000992:mmc1.doc]

**Tabla suplementaria**. Características sociodemográficas y paraclínicos en pacientes en manejo con biosimilar de etanercept e infliximab en el periodo 2015-2019.

| **Características socio**  **demográficas** | **n (207)** | ***%*** | **AR (110)** | **EA (70)** | **CU (12)** | **Ps (3)** | **CU+EA (3)** | **AR+EA (3)** | **Ps+EA (3)** | **AR+Ps (2)** | **AR+Ps+EA (1)** |
| --- | --- | --- | --- | --- | --- | --- | --- | --- | --- | --- | --- |
| Edad (media ± DE) | 48,7 ± 15,1 | | 54,6 ± 12,6 | 40,5 ± 13,6 | 40,9 ± 21,0 | 48,7 ± 14,5 | 37,3 ± 4,5 | 35,0 ± 13,5 | 52,7 ± 4,5 | 38,0 ± 5,7 | 42,0 ± 0,0 |
| Género |  |  |  |  |  |  |  |  |  |  |  |
| Femenino | 127 | 61,4 | 89 (80,9%) | 26 (37,14%) | 6 (50%) | 1 (33,3%) | 1 (33,3%) | 1 (33,3%) | 1 (33,3%) | 1 (50%) | 1 (100%) |
| Masculino | 80 | 38,6 | 21 (19,9%) | 44 (62,8%) | 6 (50%) | 2 (66,6%) | 2 (66,6%) | 2 (66,6%) | 2 (66,6%) | 1 (50%) | 0 (0%) |
| **Paraclínicos** | **n** | **%** |  |  |  |  |  |  |  |  |  |
| AST > 36 U/L |  |  |  |  |  |  |  |  |  |  |  |
| Inicio | 13 | 6,5 | 7 | 5 | 1 | 0 | 0 | 0 | 0 | 0 | 0 |
| Final | 11 | 5,5 | 5 | 2 | 1 | 1 | 1 | 1 | 0 | 0 | 0 |
| HLA B 27 (+) | 31 | 38,7 | 8 | 20 | 0 | 0 | 2 | 0 | 1 | 0 | 0 |
| FR (+) | 43 | 36,7 | 41 | 0 | 0 | 0 | 0 | 1 | 0 | 0 | 0 |
|  | **Promedio** | **DE** | **Promedio ± DE** | **Promedio ± DE** | **Promedio ± DE** | **Promedio ± DE** | **Promedio ± DE** | **Promedio ± DE** | **Promedio ± DE** | **Promedio ± DE** | **Promedio ± DE** |
| AST (U/L) |  |  |  |  |  |  |  |  |  |  |  |
| Inicial | 21,68 | ±21,85 | 27,54 ± 26,73 | 23,61 ± 8,17 | 31,39 ± 40,70 | 14,2 ± 0 | 26,00 ± 5,65 | 25,00 ± 7,83 | 22,50 ± 0,7 | 20,95 ± 4,2 | - |
| Final | 23,06 | ±10,82 | 21,77 ± 9,70 | 24,17 ± 9,67 | 26,00 ± 14,79 | 68,0 ± 0 | 29,00 ± 10,81 | 28,00 ± 14,14 | 23,85 ± 5,9 | 19,00 ± 5,7 | - |
| Creatinina (mg/dL) |  |  |  |  |  |  |  |  |  |  |  |
| Inicial | 0,8 | ± 0,19 | 0,76 ± 0,16 | 0,9 ± 0,23 | 0,79 ± 0,19 | 0,91 ± 0 | 0,73 ± 0,12 | 0,94 ± 0,09 | 0,91 ± 0,3 | 0,99 ± 0,1 | 0,68 ± 0 |
| Final | 0,8 | ±0,18 | 0,75 ± 0,16 | 0,91 ± 0,19 | 0,79 ± 0,13 | 1,0 ± 0 | 0,80 ± 0,17 | 0,95 ± 0,04 | 0,90 ± 0,3 | 0,97 ± 0,2 | 0,74 ± 0 |
| HB (g/dL) |  |  |  |  |  |  |  |  |  |  |  |
| Inicial | 14,4 | ±1,93 | 13,86 ± 1,91 | 15,14 ± 1,63 | 14,22 ± 0,99 | 14,75 ± 1,62 | 13,87 ± 1,72 | 16,50 ± 2,81 | 15,03 ± 1,09 | 15,7 ± 0,4 | 4,8 ± 0 |
| Final | 14,24 | ±1,68 | 13,65 ± 1,66 | 14,87 ± 1,55 | 14,85 ± 1,50 | 15,05 ± 0,21 | 15,43 ± 0,51 | 15,60 ± 0,6 | 14,87 ± 1,6 | 15,5 ± 0,4 | 14,5 ± 0 |
| HTO (%) |  |  |  |  |  |  |  |  |  |  |  |
| Inicial | 43,52 | ±4,85 | 41,8 ± 19,25 | 45,27 ± 17,80 | 44,64 ± 3,86 | 41,40 ± 3,39 | 48,7 ± 0 | 48,30 ± 8,93 | 47,00 ± 5,06 | 46,5 ± 6,4 | 43,0 ± 0 |
| Final | 43,29 | ±4,62 | 40,89 ± 20,6 | 45,28 ± 21,24 | 43,78 ± 4,62 | 47,75 ± 1,48 | 48,3 ± 1,13 | 46,55 ± 0,70 | 45,73 ± 3,52 | 45,25 ± 0,4 | 45,0 ± 0 |
| WBC (c/mm3) |  |  |  |  |  |  |  |  |  |  |  |
| Inicial | 7336 | ±2653 | 6982 ± 2617 | 7651 ± 2158 | 6961 ± 1834 | 8705 ± 3415 | 7100 ± 2658 | 8476 ± 786 | 8936 ± 1042 | 10420 ± 7608 | 4760 ± 0 |
| Final | 7175 | ±2172 | 6996 ± 2131 | 7533 ± 2363 | 7137 ± 2797 | 5710 ± 1004 | 6843 ± 1577 | 7290 ± 438 | 8683 ± 1766 | 6340 ± 1159 | 4770 ± 0 |
| PCR (mg/dL) |  |  |  |  |  |  |  |  |  |  |  |
| Inicial | 18,67 | ±76,89 | 18,73 ± 75,40 | 7,48 ± 14,77 | 6,97 ± 14,30 | - | 40,86 ± 57,47 | 2,28 ± 3,1 | 4,16 ± 6,8 | 4,23 ± 6 | - |
| Final | 6,56 | ±18,88 | 6,18 ± 9,96 | 4,99 ± 17,82 | 3,90 ± 5,06 | - | 0,68 ± 0,48 | 8,90 ± 2,0 | 0,13 ± 0,1 | 1,55 ± 2,1 | 0,13 ± 0 |
| VSG (mm/h) |  |  |  |  |  |  |  |  |  |  |  |
| Inicial | 19,83 | ±17,16 | 22,2 ± 15,35 | 16,1 ± 14,16 | 44,2 ± 47,83 | - | 17,3 ± 20,79 | 15,00 ± 7,1 | 20,07 ± 22,7 | 11,0 ± 4,2 | 8,0 ± 0 |
| Final | 21,21 | ±18,62 | 23,4 ± 21,41 | 19,1 ± 13,67 | 9,0 ± 7,70 | - | 17,0 ± 6,08 | 7,5 ± 3,5 | 30,00 ± 14,1 | 9,5 ± 7,8 | 33,0 ± 0 |

AR: Artritis reumatoide, EA: Espondilitis anquilosante, CU: Colitis ulcerativa, Ps: Psoriasis, AST: Aspartato aminotransferasa, FR: Factor reumatoide, HB: Hemoglobina, HTO: Hematocrito, WBC: White blood cell-conteo de células blancas, PCR: Proteína C reactiva, VSG: Velocidad de sedimentación globular.
